# Supplementary material for: Rapid onset honeycombing fibrosis in spontaneously breathing patient with COVID-19
Source: PubMed Central journal article supplement — Eur Respir J. 2020 Aug 27;56(2):2001808. doi: 10.1183/13993003.01808-2020 (PMC7338404; doi:10.1183/13993003.01808-2020), 2020-08-27
Supplement: ERJ-01808-2020.Shareable.pdf [file ERJ-01808-2020.Shareable.pdf]

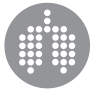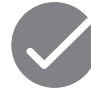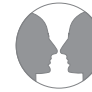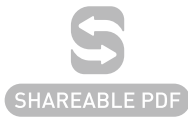

# Rapid onset honeycombing fibrosis in spontaneously breathing patient with COVID-19

Margot Combet<sup>1</sup>, Arthur Pavot <sup>1,2</sup>, Laurent Savale <sup>2,3,4</sup>, Marc Humbert <sup>2,3,4</sup> and Xavier Monnet<sup>1,2,4</sup>

**Affiliations:** <sup>1</sup>AP-HP, Service de médecine intensive-réanimation, Hôpital de Bicêtre, Le Kremlin-Bicêtre, France. <sup>2</sup>Université Paris-Saclay, Faculté de Médecine, Le Kremlin-Bicêtre, France. <sup>3</sup>AP-HP, Service de pneumologie et soins intensifs respiratoires, Centre de Référence de l'Hypertension Pulmonaire, Hôpital de Bicêtre, Le Kremlin-Bicêtre, France. <sup>4</sup>INSERM UMR\_S 999, Hôpital Marie-Lannelongue, Le Plessis-Robinson, France.

**Correspondence:** Arthur Pavot, AP-HP, Service de médecine intensive-réanimation, Hôpital de Bicêtre, 63 rue Gabriel Péri, Le Kremlin-Bicêtre, 94275, France. E-mail: pavot.arthur@gmail.com

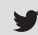

@ERSpublications

**Patients with COVID-19 should be monitored for rapid onset honeycombing fibrosis** <https://bit.ly/2B7fRcA>

**Cite this article as:** Combet M, Pavot A, Savale L, *et al.* Rapid onset honeycombing fibrosis in spontaneously breathing patient with COVID-19. *Eur Respir J* 2020; 56: 2001808 [<https://doi.org/10.1183/13993003.01808-2020>].

This single-page version can be shared freely online.

## To the Editor:

A 38-year-old man presented with a 6-day history of gradually worsening cough and asthenia and secondary anosmia and agueusia. He had no prior personal medical history. His mother had a history of diabetes mellitus and his son was followed for haemophilia A. His spouse had exhibited similar symptoms a week earlier.
